# Supplementary material for: Syntheses, topological structures and properties of six metal–organic frameworks constructed from a flexible tetracarboxylate ligand
Source: Royal Society of Chemistry journal article supplement (doi:10.1039/c5ce00078e), 2015-01-01
Supplement: c5ce00078e1.pdf [file c5ce00078e1.pdf]

## Supporting Information

### **Syntheses, Topological Structures and Properties of Six Metal-Organic Frameworks Constructed by the Flexible Tetracarboxylate Ligand**

Yu Peng, Guanghua Li, Jia Hua Zhan Shi\*, and Shouhua Feng

State Key Laboratory of Inorganic Synthesis & Preparative Chemistry, College of Chemistry, Jilin University, Changchun 130012, P. R. China

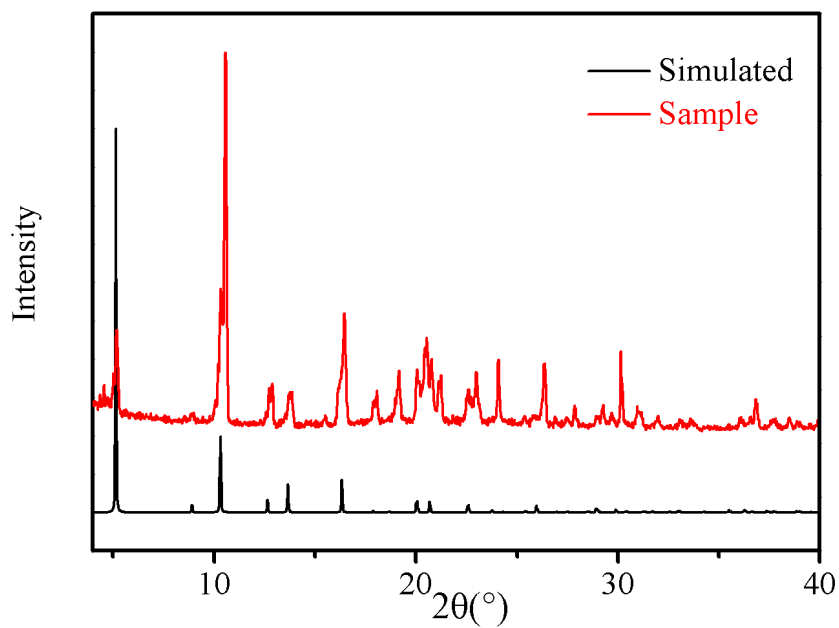

**Figure S1** X-ray powder diffraction patterns of MOF 1 and simulated samples.

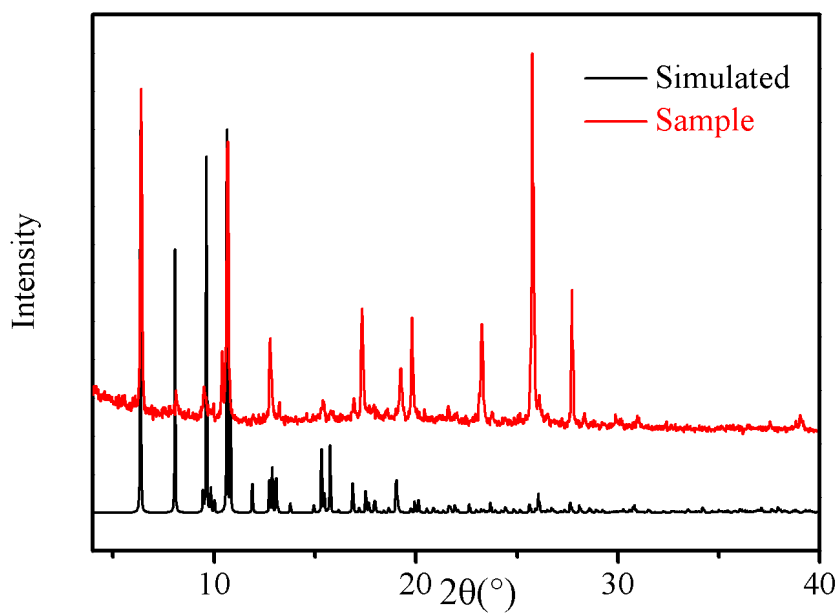

**Figure S2** X-ray powder diffraction patterns of MOF 2 and simulated samples.

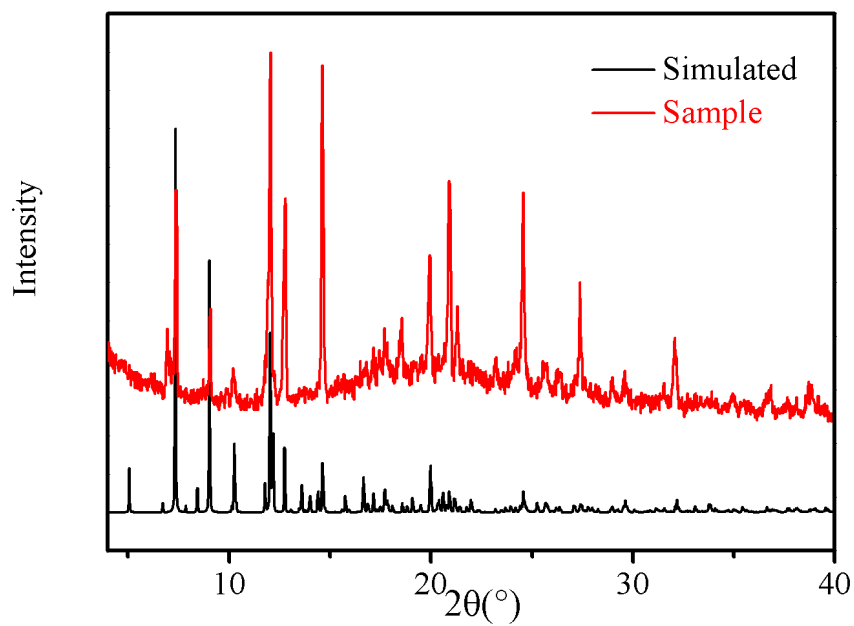

**Figure S3** X-ray powder diffraction patterns of MOF **3** and simulated samples.

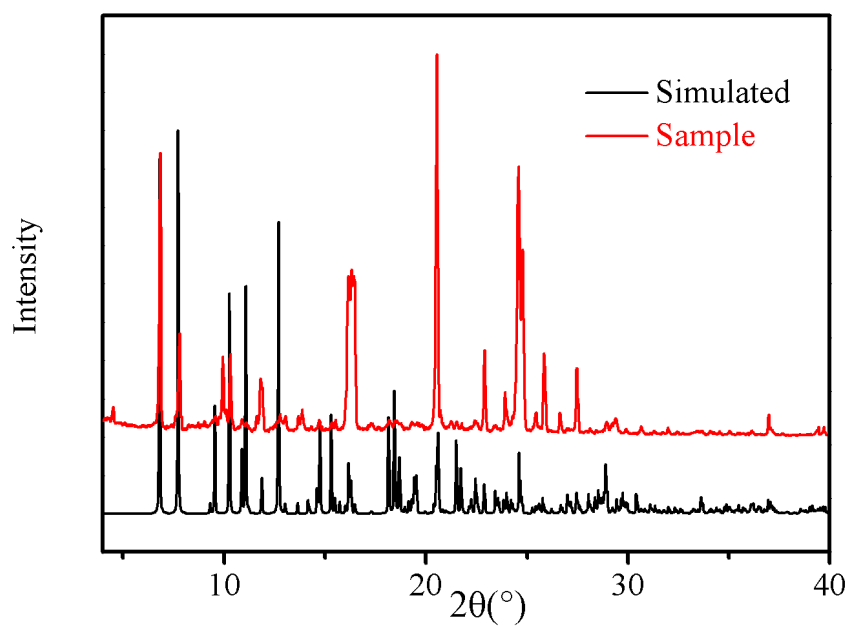

**Figure S4** X-ray powder diffraction patterns of MOF **4** and simulated samples.

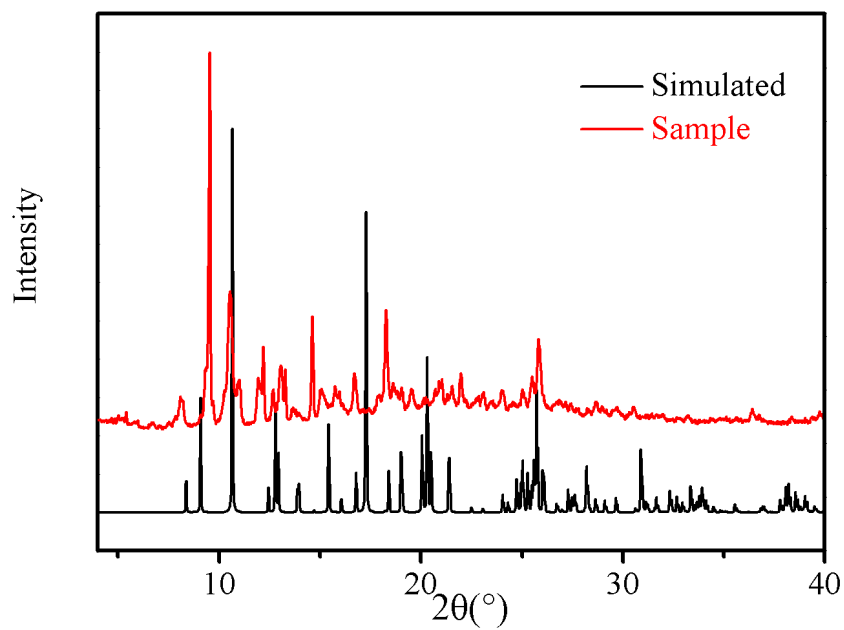

**Figure S5** X-ray powder diffraction patterns of MOF **5** and simulated samples.

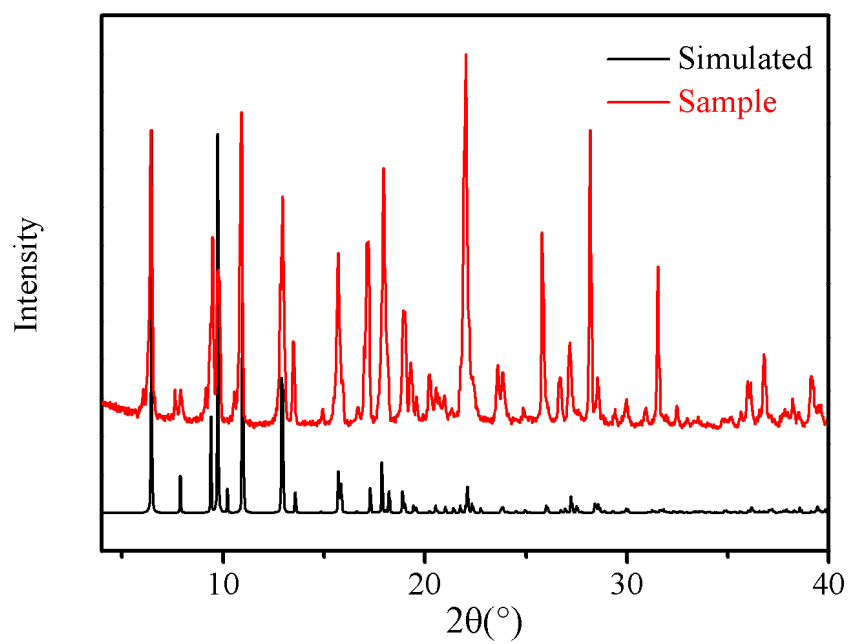

**Figure S6** X-ray powder diffraction patterns of MOF **6** and simulated samples.

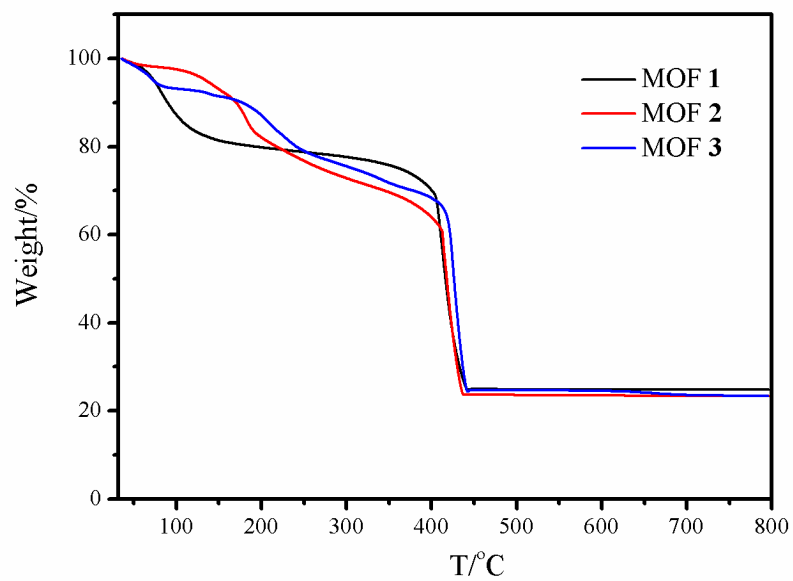

**Figure S7** TG curves for MOF 1, MOF 2 and MOF 3

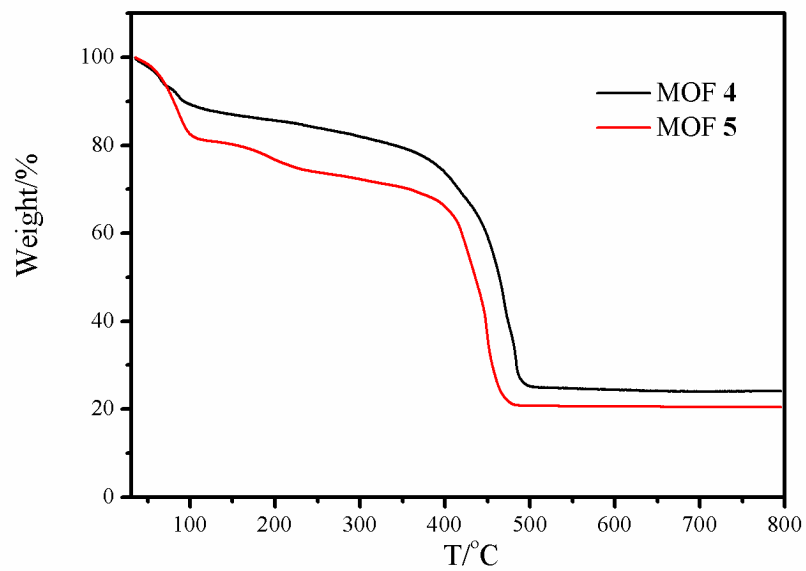

**Figure S8** TG curves for MOF 4 and MOF 5

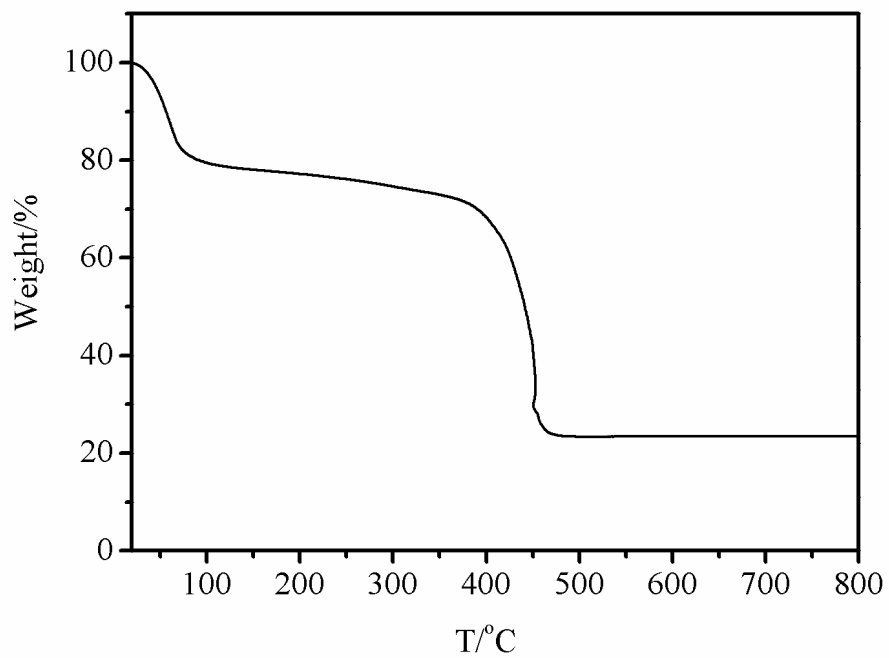

**Figure S9** TG curves for MOF 6

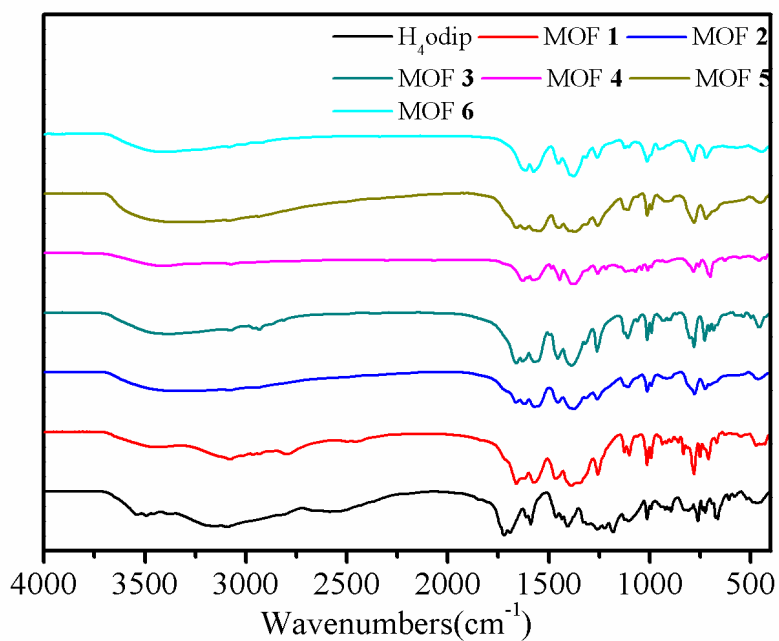

**Figure S10** IR spectra of H<sub>4</sub>odip and MOFs 1-6
